# Supplementary material for: Use of a penicillin allergy clinical decision rule to enable direct oral penicillin provocation: an international multicentre randomised control trial in an adult population (PALACE): study protocol
Source: PubMed Central journal article supplement — BMJ Open. 2022 Aug 8;12(8):e063784. doi: 10.1136/bmjopen-2022-063784 (PMC9364402; doi:10.1136/bmjopen-2022-063784), 2022-08-08
Supplement: bmjopen-2022-063784supp001.pdf [file bmjopen-2022-063784supp001.pdf]

### Patient with reported penicillin<sup>■</sup> allergy referred to outpatient clinic

■ penicillin unspecified, penicillin VK/G, amoxicillin, amoxicillin/clavulanate, ampicillin, dicloxacillin, flucloxacillin

#### Assessment for Eligibility

##### Inclusion Criteria

1. Adult patients ( $\geq 18$  years) referred to the outpatient allergy clinic for a penicillin allergy history;
2. Willing and able to give consent

##### Exclusion Criteria

1. Pregnancy;
2. Any illness that, in the investigator's judgement, will substantially increase the risk associated with subject's participation in this study (**including a non-English speaking patient if an interpreter is not available**);
3. Patients with history of type A adverse drug reaction, drug-associated anaphylaxis, idiopathic urticaria/anaphylaxis, mastocytosis, serum sickness, blistering skin eruption or acute interstitial nephritis;
4. Patients with a concurrent history of immune-mediated cephalosporin allergy;
5. Patients where the allergy history was not able to be confirmed with patient;
6. Patients on concurrent antihistamine therapy;
7. Patients receiving more than stress dose steroids (i.e. > 50mg QID hydrocortisone [or steroid equivalent<sup>♦</sup>]).

♦ **Approximate steroid equivalent:** Hydrocortisone 50 mg = Betamethasone 1.8 mg = Cortisone 62.5 mg = Dexamethasone 1.9 mg = Methylprednisolone 10 mg = Prednisone/Prednisolone 12.5 mg = Triamcinolone 10 mg

Patient recruitment  
Consent form discussed and signed

Penicillin allergy assessment with **PEN-FAST** tool  
All penicillin allergy assessment should take place during the **same medical appointment**

|                       |                                                                                                  |                                                         |
|-----------------------|--------------------------------------------------------------------------------------------------|---------------------------------------------------------|
| <b>PEN</b>            | PENicillin allergy reported by patient                                                           | <input type="checkbox"/> If yes proceed with assessment |
| <b>F</b>              | Five years or less since reaction <sup>†</sup>                                                   | <input type="checkbox"/> 2 points                       |
| <b>A</b>              | Anaphylaxis or angioedema                                                                        | <input type="checkbox"/> 2 points                       |
| <b>S</b>              | Severe cutaneous adverse reaction <sup>†</sup>                                                   | <input type="checkbox"/> 1 point                        |
| <b>T</b>              | Treatment required for reaction <sup>†</sup>                                                     | <input type="checkbox"/> Total points                   |
| <b>OR</b>             |                                                                                                  |                                                         |
| <b>Interpretation</b> |                                                                                                  |                                                         |
| 0                     | Very low risk of true penicillin allergy - <1% (<1 in 100 patients reporting penicillin allergy) |                                                         |
| 1-2                   | Low risk of true penicillin allergy - 5% (1 in 20 patients)                                      |                                                         |
| 3                     | Moderate risk of true penicillin allergy - 20% (1 in 5 patients)                                 |                                                         |
| 4-5                   | High risk of true penicillin allergy - 50% (1 in 2 patients)                                     |                                                         |

PEN-FAST  $\geq 3$   
Excluded

<sup>†</sup> Severe cutaneous adverse drug reaction - Stevens Johnson syndrome (SJS), toxic epidermal necrolysis (TEN), drug reaction with eosinophilia and systemic symptoms (DRESS), acute generalised exanthematous pustulosis (AGEP)  
© 2019 BMJ Open

## PEN-FAST < 3

During the screening and randomization procedures, ask the patient to fill the **DRUG HYPERSENSITIVITY PRE-QUESTIONNAIRE**

### 1:1 Randomisation

Randomization delivered via the Research Electronic Data Capture (REDCap) software just prior to the intervention. Randomization sequence will be developed and uploaded to REDCap by a trial statistician. No other investigator or team member will have access to the sequence

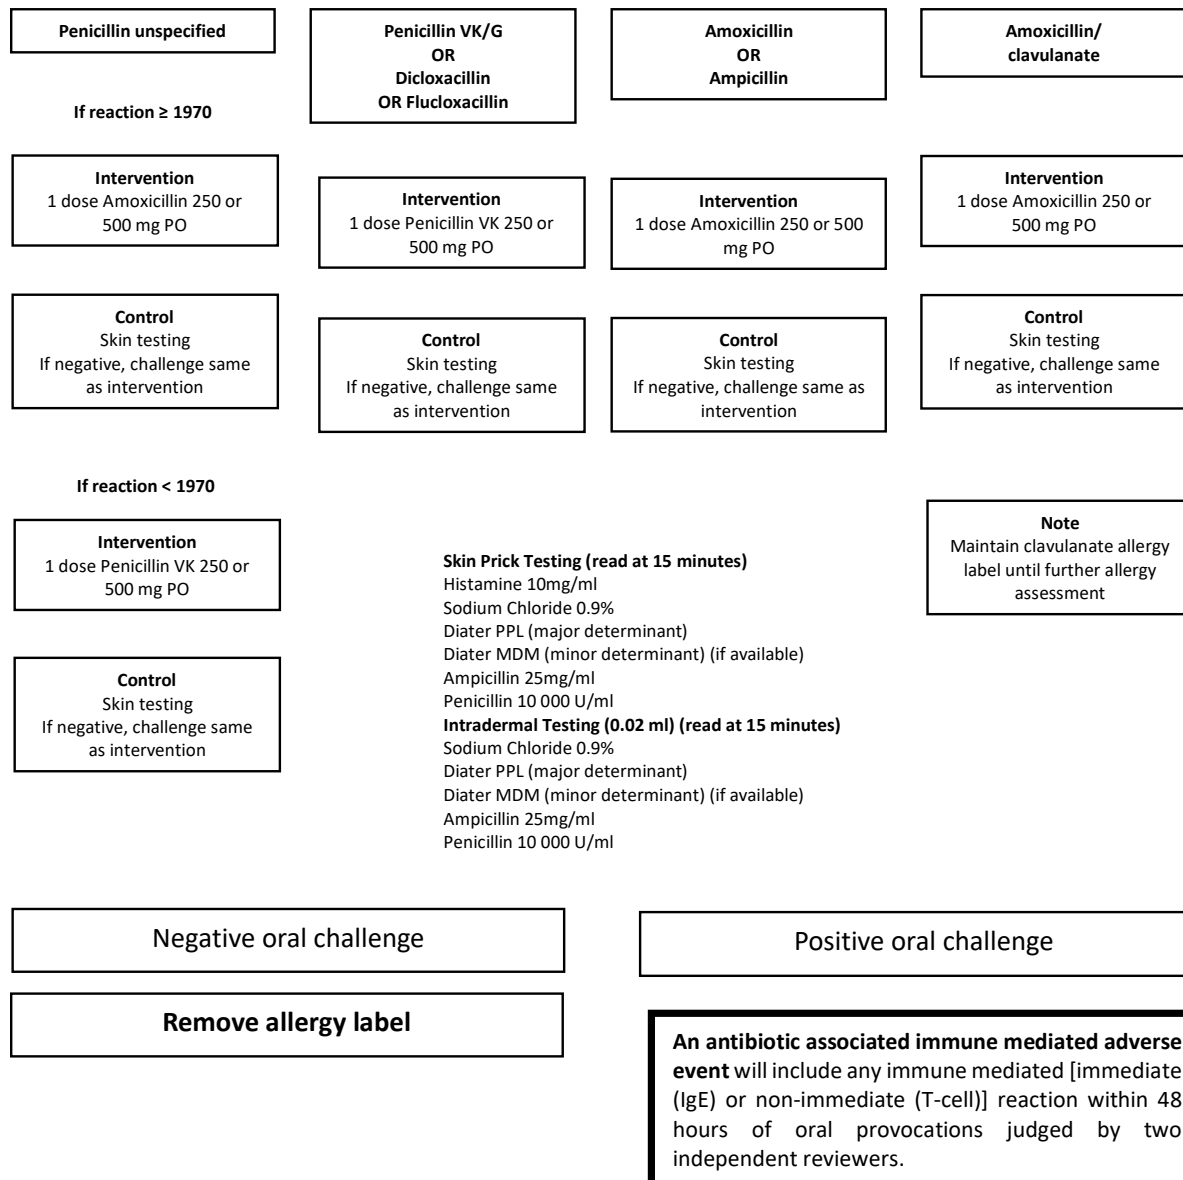

**A serious adverse event** will be defined as any adverse drug event/experience occurring at any dose that in the opinion of the investigators is causal for any of these outcomes: (1) death; (2) life threatening reaction; (3) inpatient hospitalization; (4) results in persistent or significant disability/incapacity; (5) congenital anomaly or birth defect; or (6) requires intervention to prevent permanent impairment or damage.

**An antibiotic associated adverse event** will include any non-immune mediated reaction (e.g. nausea, vomiting, diarrhea etc.) within 48 hours of oral provocations judged by two independent reviewers.

**Report to Data safety management board  
(DSMB)**
